# Supplementary material for: Journey of a molecule from the solid to the gas phase and vice versa: direct estimation of vapor pressure of alkaline-earth metalorganic precursors for atmospheric pressure vapor phase deposition of fluoride films
Source: Royal Society of Chemistry journal article supplement (doi:10.1039/d2dt00479h), 2022-01-01
Supplement: d2dt00479h1.pdf [file d2dt00479h1.pdf]

## ELECTRONIC SUPPORTING INFORMATION

**Journey of a molecule from the solid to the gas phase and vice-versa: direct estimation of vapor pressure of alkaline-earth metalorganic precursors for atmospheric pressure vapor phase deposition of fluoride films**

*Francesca Lo Presti, Anna L. Pellegrino and Graziella Malandrino\**

Dipartimento di Scienze Chimiche, Università degli Studi di Catania, INSTM UdR Catania, Viale Andrea Doria 6, I-95125 Catania, Italy;  
E-mail: [graziella.malandrino@unict.it](mailto:graziella.malandrino@unict.it)

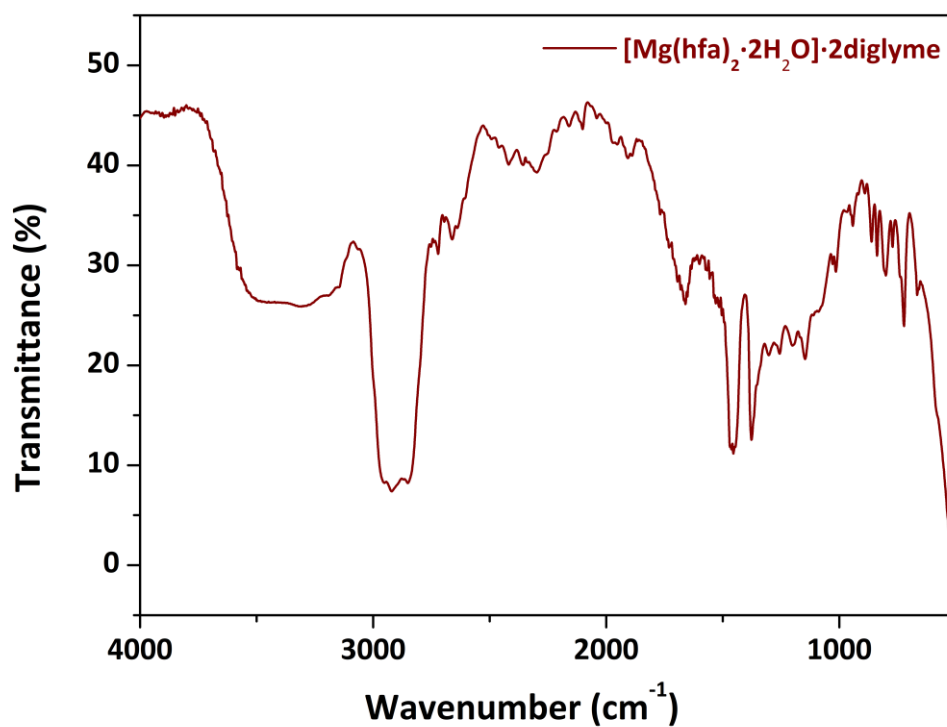

Fig. S1. FT-IR spectrum of the Mg adduct with the diglyme,  $[\text{Mg}(\text{hfa})_2 \cdot 2\text{H}_2\text{O}] \cdot 2\text{diglyme}$ .

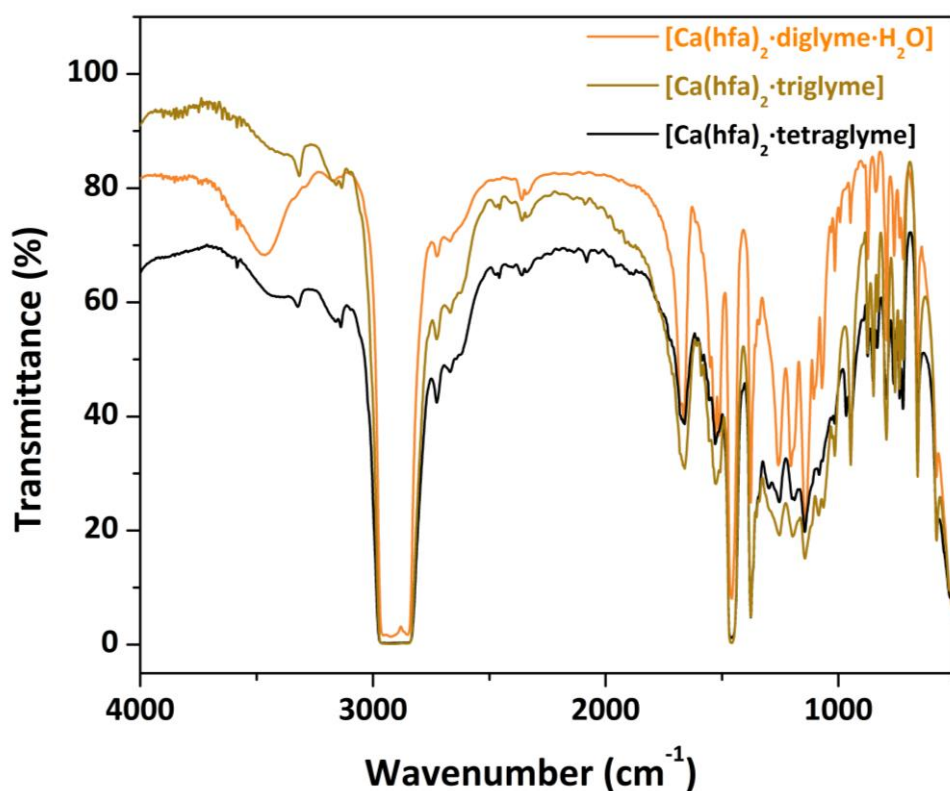

Fig. S2. FT-IR spectra of the Ca adducts with diglyme, triglyme and tetraglyme.

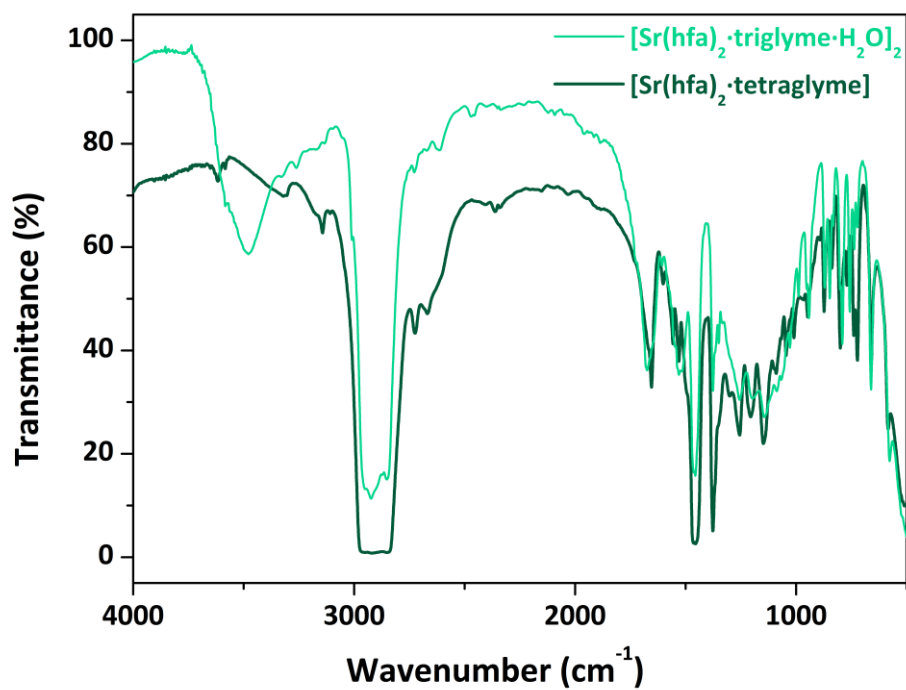

Fig. S3. FT-IR spectra of the Sr adduct with triglyme and tetraglyme.

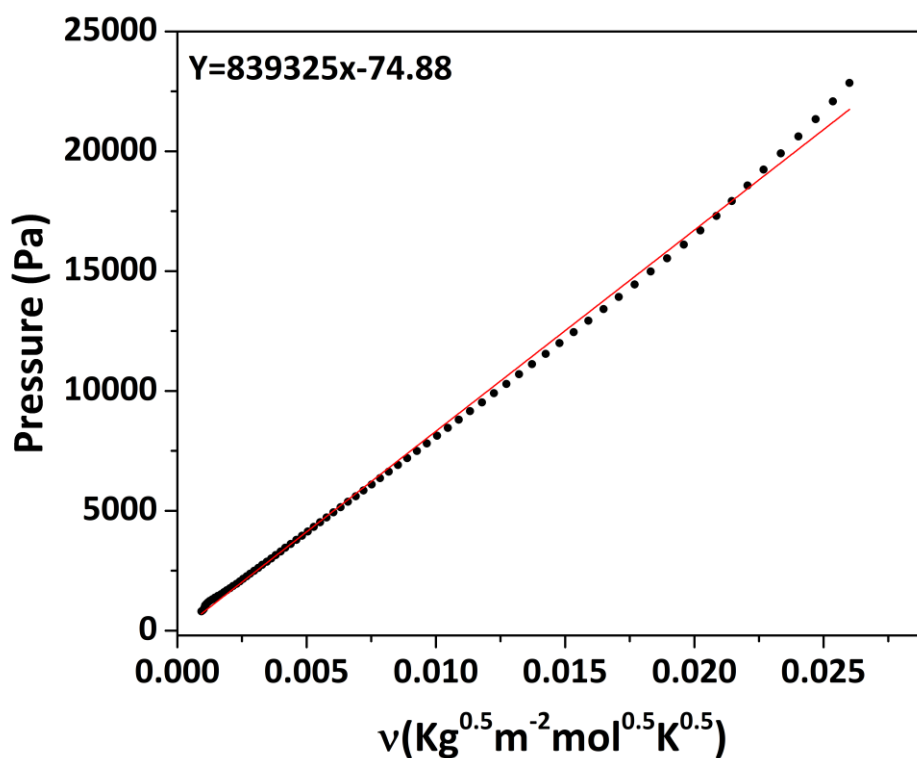

Fig. S4. Extrapolation of the  $k$  value from three distinct experiments on benzoic acid.

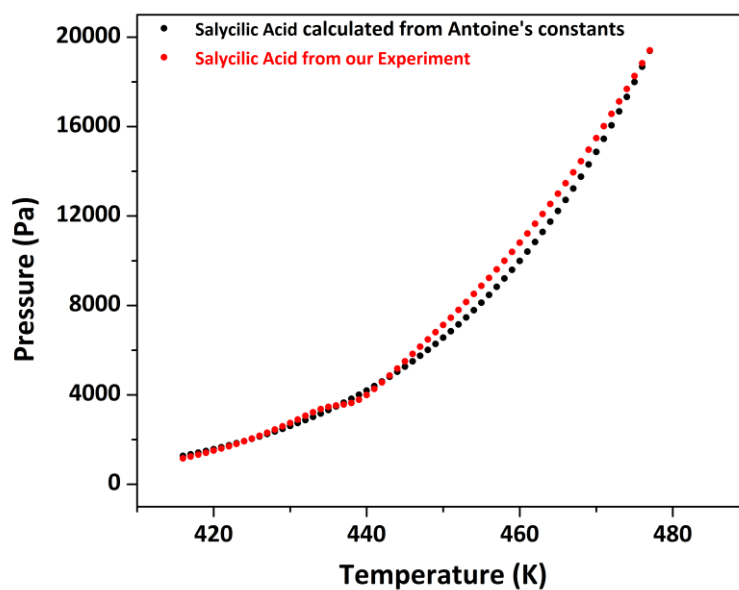

**Fig. S5.** Comparison of the vapor pressure of salicylic acid, determined in our experiments and the value derived from the Antoine' equation.

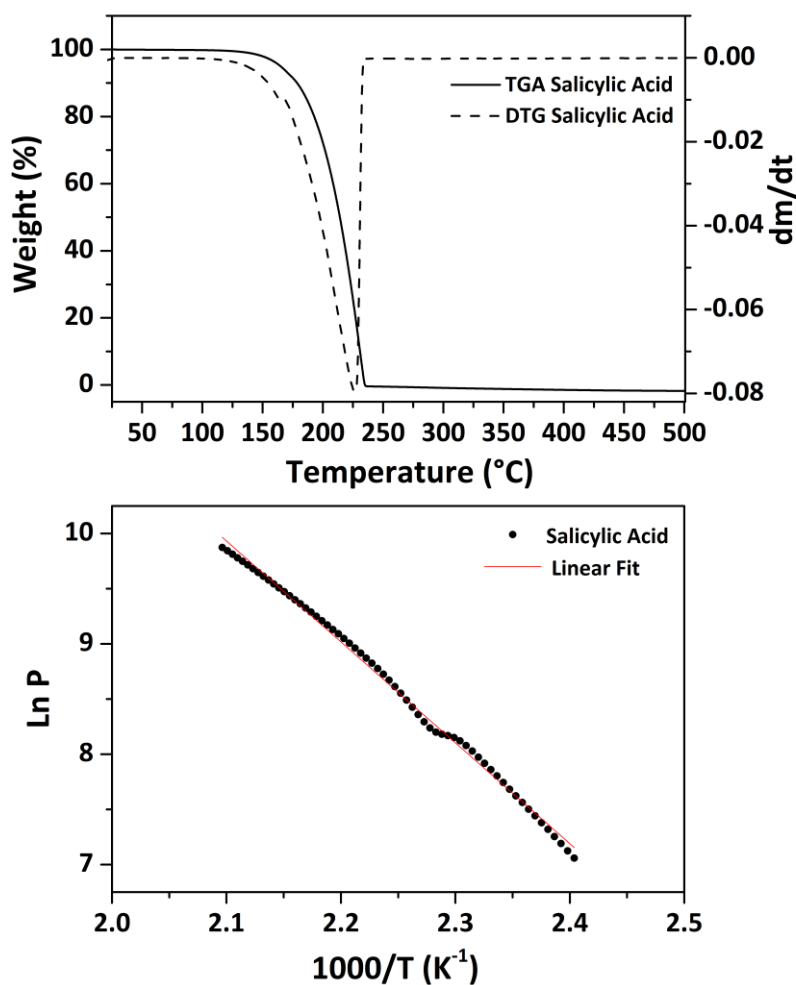

**Fig. S6.** TGA/DTG plot and Clausius-Clapeyron's plot of salicylic acid.

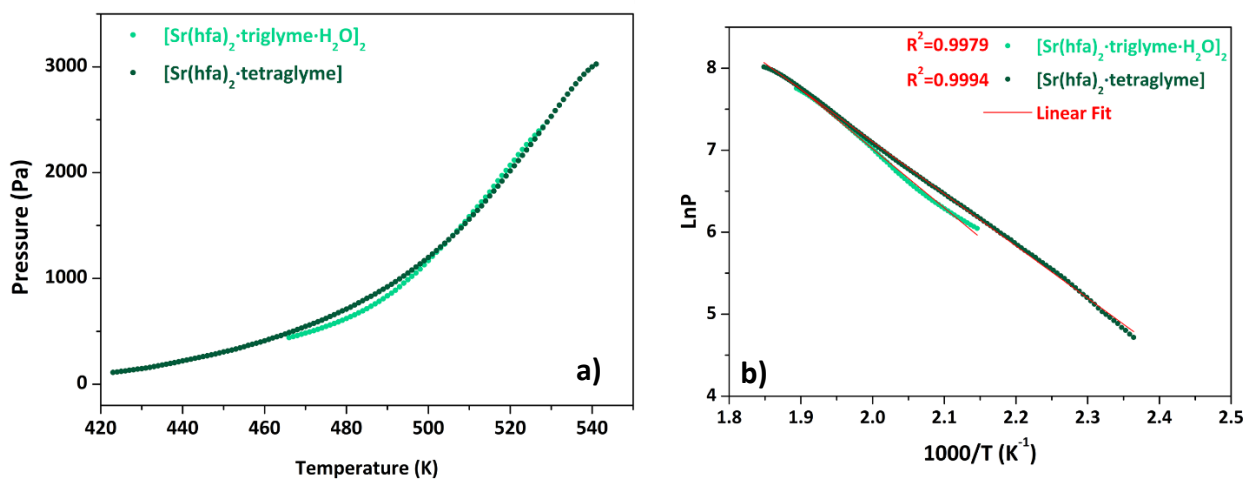

**Fig. S7.** Vapor pressure/temperature and ln P vs 1/T plots of “Sr(hfa)<sub>2</sub>·L” adducts (with L=triglyme, tetraglyme).

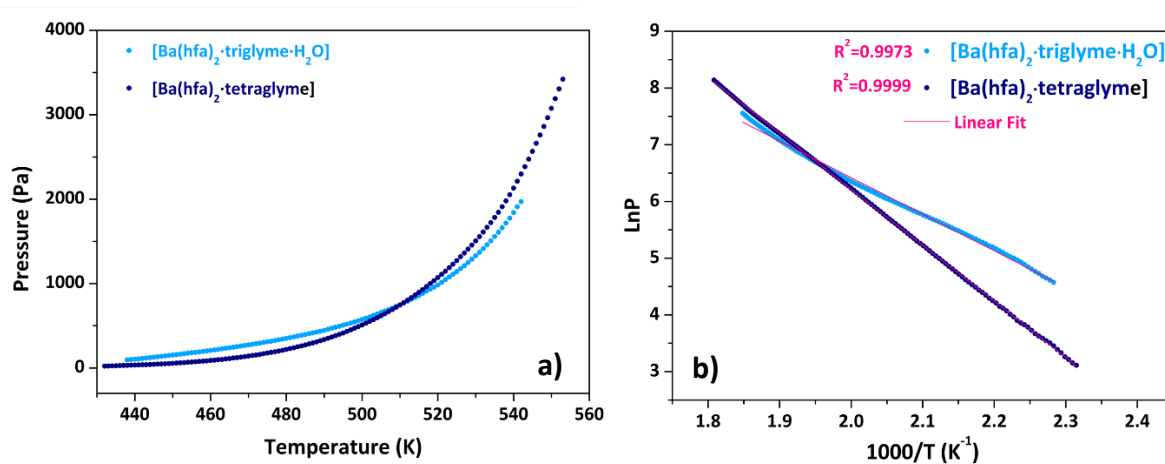

**Fig. S8.** Vapor pressure/temperature and ln P vs 1/T plots of “Ba(hfa)<sub>2</sub>·L” adducts (with L=triglyme, tetraglyme).

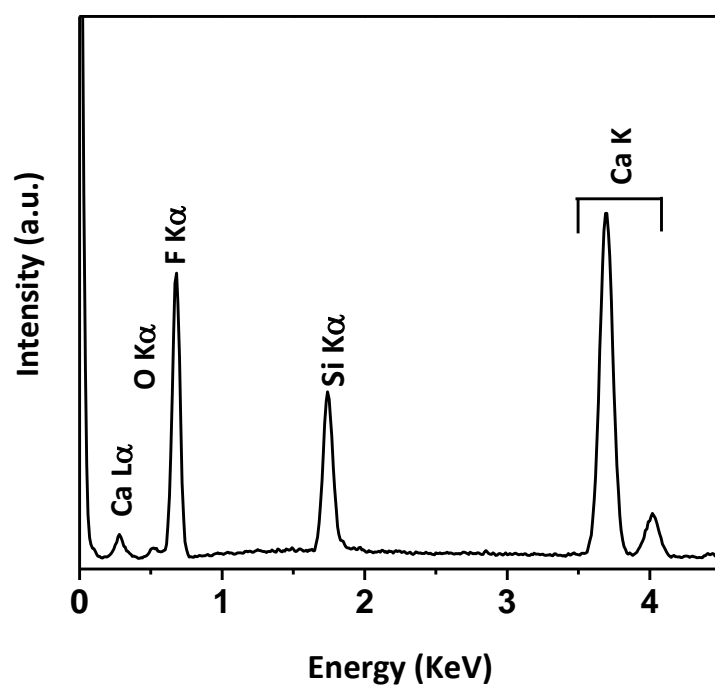

Fig. S9. EDX spectrum of the  $\text{CaF}_2$  film deposited on Si.

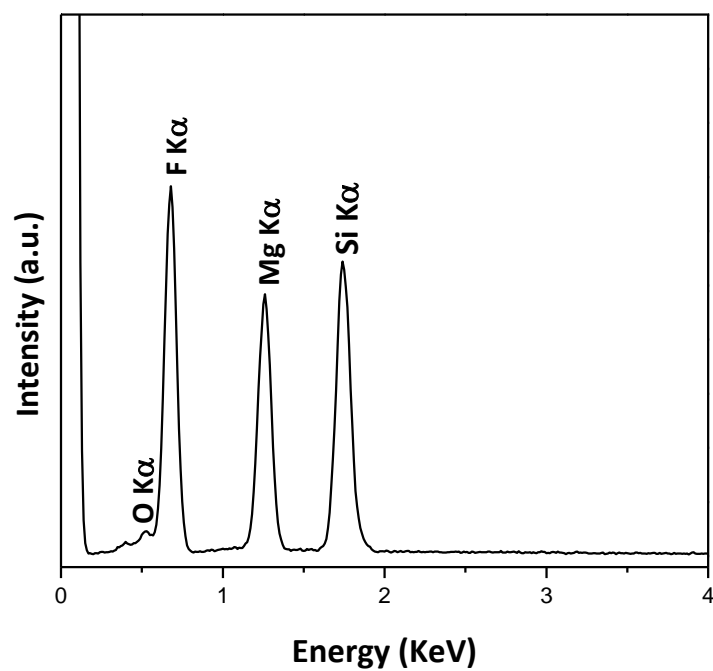

Fig. S10. EDX spectrum of the  $\text{MgF}_2$  film deposited on Si.
